# Supplementary material for: Staff Resources in Public and Private Hospitals and Their Implication for Medical Practice: A French Study of Caesareans
Source: MDPI journal article supplement (doi:10.3390/healthcare12101007), 2024-05-14
Supplement: s1 [file s1]

## Supplementary Materials

**Table S1. Effect of individual and hospital factors on caesareans. Multilevel logit models (coefficient estimates). All population.**

| Sample: All population         |                     |                     |
|--------------------------------|---------------------|---------------------|
| Dependent variable:            | Caesarean<br>(1)    | Caesarean<br>(2)    |
| <b>Demographic variables</b>   |                     |                     |
| Age (years)                    | 0.044***<br>(0.002) | 0.044***<br>(0.002) |
| Nulliparous                    | 1.185***<br>(0.072) | 1.185***<br>(0.072) |
| <b>Clinical risk variables</b> |                     |                     |
| Previous caesarean             | 3.050***<br>(0.108) | 3.050***<br>(0.108) |
| Diabetes                       | 0.299***<br>(0.038) | 0.299***<br>(0.038) |
| Hypertension                   | 0.510***<br>(0.067) | 0.509***<br>(0.067) |
| Eclampsia/Preeclampsia         | 1.215***<br>(0.089) | 1.215***<br>(0.089) |
| Fetal growth restriction       | 0.575***<br>(0.148) | 0.576***<br>(0.148) |
| Placental disorder             | 2.339***<br>(0.230) | 2.340***<br>(0.230) |
| Other pathology                | 0.030*<br>(0.013)   | 0.030*<br>(0.013)   |
| Multiple pregnancy             | 0.534***<br>(0.124) | 0.534***<br>(0.124) |
| Preterm delivery               | 0.469***<br>(0.098) | 0.469***<br>(0.098) |
| Post-term delivery             | 0.778***<br>(0.089) | 0.778***<br>(0.089) |
| Abnormal presentation          | 3.510***<br>(0.108) | 3.511***<br>(0.108) |
| Induced labor                  | 0.182*<br>(0.084)   | 0.182*<br>(0.084)   |
| Low birth weight               | 0.576***<br>(0.048) | 0.575***<br>(0.048) |
| High birth weight              | 0.644***<br>(0.067) | 0.644***<br>(0.067) |
| <b>Hospital type variables</b> |                     |                     |

|                                        |           |           |
|----------------------------------------|-----------|-----------|
| Private                                | 0.418*    |           |
|                                        | (0.165)   |           |
| Neonatology unit                       | 0.078     | 0.110     |
|                                        | (0.070)   | (0.067)   |
| Neonatal intensive unit                | 0.151*    | 0.169*    |
|                                        | (0.076)   | (0.081)   |
| University                             | 0.107     |           |
|                                        | (0.169)   |           |
| <b>Hospital organization variables</b> |           |           |
| On-call obstetrician                   | 0.041     | 0.032     |
|                                        | (0.063)   | (0.065)   |
| Non-working day                        | -0.506*** | -0.506*** |
|                                        | (0.056)   | (0.056)   |
| Small size                             | -0.214    | -0.226    |
|                                        | (0.116)   | (0.118)   |
| Large size                             | -0.101*   | -0.109*   |
|                                        | (0.045)   | (0.043)   |
| <b>Hospital staff variables</b>        |           |           |
| Obstetricians                          | -0.032    | -0.040    |
|                                        | (0.111)   | (0.115)   |
| Anesthetists                           | 0.175     | 0.180     |
|                                        | (0.122)   | (0.126)   |
| Midwives                               | -0.032    | -0.040    |
|                                        | (0.090)   | (0.092)   |
| <hr/>                                  |           |           |
| <b>Multilevel effects</b>              |           |           |
| Year effects                           | Fixed     | Fixed     |
| Hospital effects                       | Random    | Fixed     |
| <hr/>                                  |           |           |
| <b>Observations</b>                    | 168 120   | 168 120   |
| <hr/>                                  |           |           |

**Data source:** Yvelines district (France), 2008-2018.

**Notes:** \* P-value < 0.05; \*\* P-value < 0.01; \*\*\* P-value < 0.001. Robust standard errors clustered at the hospital level in parentheses.

**Table S2. Effect of hospital staffing ratios on caesareans. Multilevel logit models (coefficient estimates). All population. Assumption of 25% for part-time private doctors.**

| Sample: All population                                      |                   |                   |                      |                     |                     |                   |
|-------------------------------------------------------------|-------------------|-------------------|----------------------|---------------------|---------------------|-------------------|
| Dependent variable:                                         | Caesarean         |                   | Planned caesarean    |                     | Unplanned caesarean |                   |
|                                                             | (1)               | (2)               | (3)                  | (4)                 | (5)                 | (6)               |
| <b>Crossed hospital staff and hospital sector variables</b> |                   |                   |                      |                     |                     |                   |
| Obstetricians x Public                                      | -0.120<br>(0.275) | -0.107<br>(0.274) | -0.654***<br>(0.204) | -0.621**<br>(0.232) | 0.079<br>(0.373)    | 0.085<br>(0.376)  |
| Obstetricians x Private                                     | 0.237<br>(0.240)  | 0.241<br>(0.241)  | 0.144<br>(0.268)     | -0.009<br>(0.291)   | 0.130<br>(0.244)    | 0.253<br>(0.198)  |
| Anesthetists x Public                                       | 0.334<br>(0.246)  | 0.347<br>(0.250)  | 0.058<br>(0.195)     | 0.088<br>(0.198)    | 0.359<br>(0.259)    | 0.368<br>(0.261)  |
| Anesthetists x Private                                      | -0.028<br>(0.168) | -0.038<br>(0.173) | 0.017<br>(0.168)     | 0.103<br>(0.167)    | -0.076<br>(0.225)   | -0.145<br>(0.221) |
| Midwives x Public                                           | -0.111<br>(0.166) | -0.116<br>(0.162) | -0.184**<br>(0.063)  | -0.194**<br>(0.074) | -0.022<br>(0.207)   | -0.026<br>(0.200) |
| Midwives x Private                                          | 0.083<br>(0.104)  | 0.064<br>(0.107)  | -0.186<br>(0.098)    | -0.167<br>(0.098)   | 0.262<br>(0.144)    | 0.223<br>(0.137)  |
| <b>Control variables</b>                                    |                   |                   |                      |                     |                     |                   |
| Demographics                                                | Yes               | Yes               | Yes                  | Yes                 | Yes                 | Yes               |
| Clinical risks                                              | Yes               | Yes               | Yes                  | Yes                 | Yes                 | Yes               |
| Hospital type                                               | Yes               | Yes               | Yes                  | Yes                 | Yes                 | Yes               |
| Hospital organization                                       | Yes               | Yes               | Yes                  | Yes                 | Yes                 | Yes               |
| <b>Multilevel effects</b>                                   |                   |                   |                      |                     |                     |                   |
| Year effects                                                | Fixed             | Fixed             | Fixed                | Fixed               | Fixed               | Fixed             |
| Hospital effects                                            | Random            | Fixed             | Random               | Fixed               | Random              | Fixed             |
| <b>Observations</b>                                         | 168 120           | 168 120           | 168 090              | 168 090             | 150 226             | 150 226           |

**Data source:** Yvelines district (France), 2008-2018.

**Notes:** \* P-value < 0.05; \*\* P-value < 0.01; \*\*\* P-value < 0.001. Robust standard errors clustered at the hospital level in parentheses. Control variables included for demographics: age and parity; for clinical risks: previous caesarean, diabetes, hypertension, eclampsia or preeclampsia, fetal growth restriction, placental disorder, other obstetric pathology, plurality, term at delivery, fetal presentation, induced labor, and birth weight; for hospital type: sector, equipment level, university status; and for hospital organization: obstetrician availability, day of delivery, and size.

**Table S3. Effect of hospital staffing ratios on caesareans. Multilevel logit models (coefficient estimates). All population. Assumption of 75% for part-time private doctors.**

| Sample: All population                                      |                   |                   |                      |                     |                     |                   |
|-------------------------------------------------------------|-------------------|-------------------|----------------------|---------------------|---------------------|-------------------|
| Dependent variable:                                         | Caesarean         |                   | Planned caesarean    |                     | Unplanned caesarean |                   |
|                                                             | (1)               | (2)               | (3)                  | (4)                 | (5)                 | (6)               |
| <b>Crossed hospital staff and hospital sector variables</b> |                   |                   |                      |                     |                     |                   |
| Obstetricians x Public                                      | -0.118<br>(0.283) | -0.100<br>(0.278) | -0.658***<br>(0.197) | -0.616**<br>(0.225) | 0.091<br>(0.365)    | 0.097<br>(0.370)  |
| Obstetricians x Private                                     | 0.066<br>(0.134)  | 0.044<br>(0.145)  | 0.065<br>(0.221)     | -0.087<br>(0.229)   | -0.051<br>(0.174)   | 0.036<br>(0.150)  |
| Anesthetists x Public                                       | 0.351<br>(0.250)  | 0.365<br>(0.252)  | 0.075<br>(0.194)     | 0.094<br>(0.197)    | 0.359<br>(0.263)    | 0.376<br>(0.267)  |
| Anesthetists x Private                                      | 0.022<br>(0.115)  | 0.032<br>(0.124)  | 0.008<br>(0.126)     | 0.101<br>(0.125)    | 0.011<br>(0.136)    | -0.039<br>(0.134) |
| Midwives x Public                                           | -0.119<br>(0.171) | -0.123<br>(0.166) | -0.194**<br>(0.063)  | -0.197*<br>(0.078)  | -0.017<br>(0.212)   | -0.024<br>(0.205) |
| Midwives x Private                                          | 0.070<br>(0.126)  | 0.050<br>(0.129)  | -0.181*<br>(0.097)   | -0.177<br>(0.109)   | 0.235<br>(0.203)    | 0.200<br>(0.196)  |
| <b>Control variables</b>                                    |                   |                   |                      |                     |                     |                   |
| Demographics                                                | Yes               | Yes               | Yes                  | Yes                 | Yes                 | Yes               |
| Clinical risks                                              | Yes               | Yes               | Yes                  | Yes                 | Yes                 | Yes               |
| Hospital type                                               | Yes               | Yes               | Yes                  | Yes                 | Yes                 | Yes               |
| Hospital organization                                       | Yes               | Yes               | Yes                  | Yes                 | Yes                 | Yes               |
| <b>Multilevel effects</b>                                   |                   |                   |                      |                     |                     |                   |
| Year effects                                                | Fixed             | Fixed             | Fixed                | Fixed               | Fixed               | Fixed             |
| Hospital effects                                            | Random            | Fixed             | Random               | Fixed               | Random              | Fixed             |
| <b>Observations</b>                                         | 168 120           | 168 120           | 168 090              | 168 090             | 150 226             | 150 226           |

**Data source:** Yvelines district (France), 2008-2018.

**Notes:** \* P-value < 0.05; \*\* P-value < 0.01; \*\*\* P-value < 0.001. Robust standard errors clustered at the hospital level in parentheses. Control variables included for demographics: age and parity; for clinical risks: previous caesarean, diabetes, hypertension, eclampsia or preeclampsia, fetal growth restriction, placental disorder, other obstetric pathology, plurality, term at delivery, fetal presentation, induced labor, and birth weight; for hospital type: sector, equipment level, university status; and for hospital organization: obstetrician availability, day of delivery, and size.

**Table S4. Effect of hospital staffing ratios on caesareans. Multilevel logit models (coefficient estimates). High-risk population. Assumption of 25% for part-time private doctors.**

| Sample: High-risk population                                |                   |                   |                     |                    |                     |                   |
|-------------------------------------------------------------|-------------------|-------------------|---------------------|--------------------|---------------------|-------------------|
| Dependent variable:                                         | Caesarean         |                   | Planned caesarean   |                    | Unplanned caesarean |                   |
|                                                             | (1)               | (2)               | (3)                 | (4)                | (5)                 | (6)               |
| <b>Crossed hospital staff and hospital sector variables</b> |                   |                   |                     |                    |                     |                   |
| Obstetricians x Public                                      | -0.217<br>(0.238) | -0.181<br>(0.249) | -0.852**<br>(0.279) | -0.790*<br>(0.322) | 0.077<br>(0.299)    | 0.088<br>(0.318)  |
| Obstetricians x Private                                     | 0.222<br>(0.231)  | 0.197<br>(0.258)  | -0.189<br>(0.282)   | -0.447<br>(0.301)  | 0.209<br>(0.230)    | 0.385<br>(0.210)  |
| Anesthetists x Public                                       | 0.226<br>(0.230)  | 0.269<br>(0.231)  | 0.035<br>(0.208)    | 0.098<br>(0.210)   | 0.228<br>(0.254)    | 0.260<br>(0.255)  |
| Anesthetists x Private                                      | 0.045<br>(0.134)  | 0.037<br>(0.147)  | 0.155<br>(0.159)    | 0.302<br>(0.130)   | 0.004<br>(0.195)    | -0.138<br>(0.193) |
| Midwives x Public                                           | 0.003<br>(0.149)  | -0.011<br>(0.139) | -0.132*<br>(0.066)  | -0.149*<br>(0.070) | 0.098<br>(0.195)    | 0.087<br>(0.185)  |
| Midwives x Private                                          | 0.113<br>(0.122)  | 0.085<br>(0.126)  | -0.096<br>(0.111)   | -0.066<br>(0.104)  | 0.240<br>(0.178)    | 0.175<br>(0.164)  |
| <b>Control variables</b>                                    |                   |                   |                     |                    |                     |                   |
| Demographics                                                | Yes               | Yes               | Yes                 | Yes                | Yes                 | Yes               |
| Clinical risks                                              | Yes               | Yes               | Yes                 | Yes                | Yes                 | Yes               |
| Hospital type                                               | Yes               | Yes               | Yes                 | Yes                | Yes                 | Yes               |
| Hospital organization                                       | Yes               | Yes               | Yes                 | Yes                | Yes                 | Yes               |
| <b>Multilevel effects</b>                                   |                   |                   |                     |                    |                     |                   |
| Year effects                                                | Fixed             | Fixed             | Fixed               | Fixed              | Fixed               | Fixed             |
| Hospital effects                                            | Random            | Fixed             | Random              | Fixed              | Random              | Fixed             |
| <b>Observations</b>                                         | 82 850            | 82 850            | 82 828              | 82 828             | 68 517              | 68 517            |

**Data source:** Yvelines district (France), 2008-2018.

**Notes:** \* P-value < 0.05; \*\* P-value < 0.01; \*\*\* P-value < 0.001. Robust standard errors clustered at the hospital level in parentheses. Control variables included for demographics: age and parity; for clinical risks: previous caesarean, diabetes, hypertension, eclampsia or preeclampsia, fetal growth restriction, placental disorder, other obstetric pathology, plurality, term at delivery, fetal presentation, induced labor, and birth weight; for hospital type: sector, equipment level,

university status; and for hospital organization: obstetrician availability, day of delivery, and size.

**Table S5. Effect of hospital staffing ratios on caesareans. Multilevel logit models (coefficient estimates). High-risk population. Assumption of 75% for part-time private doctors.**

| Sample: High-risk population                                |                   |                   |                     |                    |                     |                   |
|-------------------------------------------------------------|-------------------|-------------------|---------------------|--------------------|---------------------|-------------------|
| Dependent variable:                                         | Caesarean         |                   | Planned caesarean   |                    | Unplanned caesarean |                   |
|                                                             | (1)               | (2)               | (3)                 | (4)                | (5)                 | (6)               |
| <b>Crossed hospital staff and hospital sector variables</b> |                   |                   |                     |                    |                     |                   |
| Obstetricians x Public                                      | -0.230<br>(0.246) | -0.188<br>(0.252) | -0.850**<br>(0.277) | -0.775*<br>(0.326) | 0.067<br>(0.304)    | 0.082<br>(0.322)  |
| Obstetricians x Private                                     | 0.154<br>(0.103)  | 0.099<br>(0.141)  | -0.143<br>(0.261)   | -0.416<br>(0.253)  | 0.112<br>(0.142)    | 0.246<br>(0.169)  |
| Anesthetists x Public                                       | 0.249<br>(0.235)  | 0.291<br>(0.232)  | 0.027<br>(0.206)    | 0.077<br>(0.212)   | 0.242<br>(0.259)    | 0.283<br>(0.259)  |
| Anesthetists x Private                                      | 0.061<br>(0.103)  | 0.089<br>(0.119)  | 0.067<br>(0.191)    | 0.237<br>(0.147)   | 0.072<br>(0.108)    | -0.020<br>(0.105) |
| Midwives x Public                                           | -0.014<br>(0.156) | -0.026<br>(0.143) | -0.128<br>(0.068)   | -0.138<br>(0.078)  | 0.087<br>(0.203)    | 0.075<br>(0.192)  |
| Midwives x Private                                          | 0.111<br>(0.137)  | 0.075<br>(0.139)  | -0.092<br>(0.126)   | -0.096<br>(0.134)  | 0.219<br>(0.218)    | 0.163<br>(0.207)  |
| <b>Control variables</b>                                    |                   |                   |                     |                    |                     |                   |
| Demographics                                                | Yes               | Yes               | Yes                 | Yes                | Yes                 | Yes               |
| Clinical risks                                              | Yes               | Yes               | Yes                 | Yes                | Yes                 | Yes               |
| Hospital type                                               | Yes               | Yes               | Yes                 | Yes                | Yes                 | Yes               |
| Hospital organization                                       | Yes               | Yes               | Yes                 | Yes                | Yes                 | Yes               |
| <b>Multilevel effects</b>                                   |                   |                   |                     |                    |                     |                   |
| Year effects                                                | Fixed             | Fixed             | Fixed               | Fixed              | Fixed               | Fixed             |
| Hospital effects                                            | Random            | Fixed             | Random              | Fixed              | Random              | Fixed             |
| <b>Observations</b>                                         | 82 850            | 82 850            | 82 828              | 82 828             | 68 517              | 68 517            |

**Data source:** Yvelines district (France), 2008-2018.

**Notes:** \* P-value < 0.05; \*\* P-value < 0.01; \*\*\* P-value < 0.001. Robust standard errors clustered at the hospital level in parentheses. Control variables included for demographics: age and parity; for clinical risks: previous caesarean, diabetes, hypertension, eclampsia or preeclampsia, fetal growth restriction, placental disorder, other obstetric pathology, plurality, term at delivery, fetal presentation, induced labor, and birth weight; for hospital type: sector, equipment level,

university status; and for hospital organization: obstetrician availability, day of delivery, and size.



**Table S6. Effect of hospital staffing ratios on caesareans. Multilevel logit models (coefficient estimates). Low-risk population. Assumption of 25% for part-time private doctors.**

| Sample: Low-risk population                                 |                   |                   |                     |                     |                     |                   |
|-------------------------------------------------------------|-------------------|-------------------|---------------------|---------------------|---------------------|-------------------|
| Dependent variable:                                         | Caesarean         |                   | Planned caesarean   |                     | Unplanned caesarean |                   |
|                                                             | (1)               | (2)               | (3)                 | (4)                 | (5)                 | (6)               |
| <b>Crossed hospital staff and hospital sector variables</b> |                   |                   |                     |                     |                     |                   |
| Obstetricians x Public                                      | -0.107<br>(0.426) | -0.163<br>(0.421) | 0.273<br>(0.997)    | -0.281<br>(1.307)   | -0.142<br>(0.519)   | -0.202<br>(0.534) |
| Obstetricians x Private                                     | 0.690<br>(0.433)  | 0.852*<br>(0.362) | 1.425***<br>(0.324) | 1.067**<br>(0.352)  | 0.098<br>(0.557)    | 0.608<br>(0.431)  |
| Anesthetists x Public                                       | 0.452<br>(0.272)  | 0.382<br>(0.260)  | -0.446<br>(0.267)   | -1.018**<br>(0.329) | 0.586<br>(0.308)    | 0.551<br>(0.294)  |
| Anesthetists x Private                                      | -0.208<br>(0.299) | -0.314<br>(0.301) | -0.948**<br>(0.348) | -0.751*<br>(0.336)  | -0.079<br>(0.345)   | -0.366<br>(0.330) |
| Midwives x Public                                           | -0.100<br>(0.250) | -0.102<br>(0.228) | 0.157<br>(0.341)    | 0.430<br>(0.365)    | -0.095<br>(0.297)   | -0.161<br>(0.245) |
| Midwives x Private                                          | 0.251<br>(0.227)  | 0.149<br>(0.222)  | -0.210<br>(0.196)   | -0.248<br>(0.241)   | 0.490<br>(0.289)    | 0.305<br>(0.238)  |
| <b>Control variables</b>                                    |                   |                   |                     |                     |                     |                   |
| Demographics                                                | Yes               | Yes               | Yes                 | Yes                 | Yes                 | Yes               |
| Clinical risks                                              | Yes               | Yes               | Yes                 | Yes                 | Yes                 | Yes               |
| Hospital type                                               | Yes               | Yes               | Yes                 | Yes                 | Yes                 | Yes               |
| Hospital organization                                       | Yes               | Yes               | Yes                 | Yes                 | Yes                 | Yes               |
| <b>Multilevel effects</b>                                   |                   |                   |                     |                     |                     |                   |
| Year effects                                                | Fixed             | Fixed             | Fixed               | Fixed               | Fixed               | Fixed             |
| Hospital effects                                            | Random            | Fixed             | Random              | Fixed               | Random              | Fixed             |
| <b>Observations</b>                                         | 33 370            | 33 370            | 33 369              | 33 369              | 32 271              | 32 271            |

**Data source:** Yvelines district (France), 2008-2018.

**Notes:** \* P-value < 0.05; \*\* P-value < 0.01; \*\*\* P-value < 0.001. Robust standard errors clustered at the hospital level in parentheses. Control variables included for demographics: age and parity; for clinical risks: previous caesarean, diabetes, hypertension, eclampsia or preeclampsia, fetal growth restriction, placental disorder, other obstetric pathology, plurality, term at delivery, fetal presentation, induced labor, and birth weight; for hospital type: sector, equipment level,

university status; and for hospital organization: obstetrician availability, day of delivery, and size.

**Table S7. Effect of hospital staffing ratios on caesareans. Multilevel logit models (coefficient estimates). Low-risk population. Assumption of 75% for part-time private doctors.**

| Sample: Low-risk population                                 |                   |                   |                    |                    |                     |                   |
|-------------------------------------------------------------|-------------------|-------------------|--------------------|--------------------|---------------------|-------------------|
| Dependent variable:                                         | Caesarean         |                   | Planned caesarean  |                    | Unplanned caesarean |                   |
|                                                             | (1)               | (2)               | (3)                | (4)                | (5)                 | (6)               |
| <b>Crossed hospital staff and hospital sector variables</b> |                   |                   |                    |                    |                     |                   |
| Obstetricians x Public                                      | -0.093<br>(0.435) | -0.127<br>(0.422) | 0.060<br>(1.018)   | -0.342<br>(1.322)  | -0.089<br>(0.495)   | -0.151<br>(0.508) |
| Obstetricians x Private                                     | 0.228<br>(0.365)  | 0.250<br>(0.376)  | 1.260**<br>(0.485) | 0.765#<br>(0.490)  | -0.237<br>(0.473)   | 0.050<br>(0.477)  |
| Anesthetists x Public                                       | 0.484*<br>(0.274) | 0.431<br>(0.263)  | -0.424<br>(0.272)  | -0.956*<br>(0.383) | 0.580<br>(0.308)    | 0.563<br>(0.296)  |
| Anesthetists x Private                                      | -0.147<br>(0.162) | -0.173<br>(0.165) | -0.619<br>(0.396)  | -0.369<br>(0.405)  | -0.057<br>(0.136)   | -0.218<br>(0.162) |
| Midwives x Public                                           | -0.115<br>(0.266) | -0.116<br>(0.244) | 0.103<br>(0.335)   | 0.391<br>(0.355)   | -0.067<br>(0.290)   | -0.147<br>(0.250) |
| Midwives x Private                                          | 0.234<br>(0.258)  | 0.143<br>(0.261)  | -0.197<br>(0.229)  | -0.232<br>(0.253)  | 0.472<br>(0.360)    | 0.297<br>(0.340)  |
| <b>Control variables</b>                                    |                   |                   |                    |                    |                     |                   |
| Demographics                                                | Yes               | Yes               | Yes                | Yes                | Yes                 | Yes               |
| Clinical risks                                              | Yes               | Yes               | Yes                | Yes                | Yes                 | Yes               |
| Hospital type                                               | Yes               | Yes               | Yes                | Yes                | Yes                 | Yes               |
| Hospital organization                                       | Yes               | Yes               | Yes                | Yes                | Yes                 | Yes               |
| <b>Multilevel effects</b>                                   |                   |                   |                    |                    |                     |                   |
| Year effects                                                | Fixed             | Fixed             | Fixed              | Fixed              | Fixed               | Fixed             |
| Hospital effects                                            | Random            | Fixed             | Random             | Fixed              | Random              | Fixed             |
| <b>Observations</b>                                         | 33 370            | 33 370            | 33 369             | 33 369             | 32 271              | 32 271            |

**Data source:** Yvelines district (France), 2008-2018.

**Notes:** \* P-value < 0.05; \*\* P-value < 0.01; \*\*\* P-value < 0.001. # Significant at 10%. Robust standard errors clustered at the hospital level in parentheses. Control variables included for demographics: age and parity; for clinical risks: previous caesarean, diabetes, hypertension, eclampsia or preeclampsia, fetal growth restriction, placental disorder, other obstetric pathology, plurality, term at delivery, fetal presentation, induced labor, and birth weight; for

hospital type: sector, equipment level, university status; and for hospital organization: obstetrician availability, day of delivery, and size.
